# Supplementary material for: Short protecting-group-free synthesis of 5-acetylsulfanyl-histidines in water: novel precursors of 5-sulfanyl-histidine and its analogues
Source: Royal Society of Chemistry journal article supplement (doi:10.1039/c6ob01870j), 2016-01-01

## Electronic Supplementary Information

### Short protecting-group-free synthesis of 5-acetylsulfanyl-histidines in water:

#### Novel precursors of 5-sulfanyl-histidine and analogues

Sylvain Daunay, Remi Lebel, Laurence Farescour, Jean-Claude Yadan and Irene Erdelmeier\*  
TETRAHEDRON, 14 Avenue de l'Opéra, 75001 Paris, France  
E-mail: [irene.erdelmeier@tetrahedron.fr](mailto:irene.erdelmeier@tetrahedron.fr)

### List of Contents

|                                                                                                                                     |      |
|-------------------------------------------------------------------------------------------------------------------------------------|------|
| <b>Typical procedure S1:</b> Optimisation of the synthesis of 5-acetylsulfanyl-histidine ( <b>11a</b> )<br>in aqueous solution..... | SI2  |
| <b>Figure S2.</b> <sup>1</sup> H NMR (400MHz, H <sub>2</sub> O/D <sub>2</sub> O, 6.0-9.5 ppm) of the reaction mixture.....          | SI2  |
| <b>Table S3.</b> Reaction parameters for the synthesis of 5-acetylsulfanyl-histidine ( <b>11a</b> ).....                            | SI3  |
| L-5-Acetylsulfanyl- $\alpha$ ,N,N-dimethyl-histidine ( <b>11c</b> ).....                                                            | SI4  |
| L-5-Acetylsulfanyl- $\alpha$ ,N,N,N-trimethyl-histidine ( <b>12</b> ).....                                                          | SI6  |
| L-5-sulfanyl-histidine ( <b>16a</b> ).....                                                                                          | SI7  |
| Disulfide <b>17b</b> .....                                                                                                          | SI9  |
| Disulfide <b>17c</b> .....                                                                                                          | SI11 |
| L-5-sulfanyl- $\alpha$ -N,N,N-trimethyl-histidine ( <b>16d</b> ).....                                                               | SI13 |
| Disulfide <b>17d</b> .....                                                                                                          | SI14 |
| Disulfide <b>17e</b> .....                                                                                                          | SI16 |

### Typical procedure S1: Optimisation of the synthesis of 5-acetylsulfanyl-histidine (11a) in aqueous solution

For the optimisation of reaction conditions, an aqueous solution of histidine hydrochloride hydrate (**6a** x HCl, 0.10-0.55M, 5-250 mmol, 1 equiv) and concentrated hydrochloric acid (0-1 equiv) was cooled in an ice-bath. Br<sub>2</sub> (1.3 equiv) was added rapidly dropwise, and thioacetic acid (**9**, 1-10 equiv) after 1 min. For entries 9 to 11, N-bromosuccinimide (NBS, 1.3 equiv) was added all at once as activating reagent instead of Br<sub>2</sub>, and thioacetic acid (**9**, 4 equiv) after 2.5 min (instead of 1min). After stirring for 30min at 0°C, and rapid decantation of non-converted thioacetic acid, 200µL of the reaction mixture were diluted in 500µL D<sub>2</sub>O, filtered, and the solution analysed by <sup>1</sup>H NMR (400MHz).

Characteristic imidazole H atoms of 5-acetylsulfanyl-histidine (**11a**) are detected at 8.85-8.95 ppm (H-2), non-converted histidine (**6a**) at 7.45 (H-5) and 8.87 ppm (H-2) and 2-thiohistidine (**8a**) at 6.9 ppm (H-5). The reactional yield was calculated by integration after normalization of the aromatic region between 6.6-9.5 ppm based on the assumption that all products formed are characterized by one aromatic H (either on position 2 or 5) besides non-converted histidine with 2 protons, see Fig. S2.

### Figure S2. <sup>1</sup>H NMR (400MHz, H<sub>2</sub>O/D<sub>2</sub>O, 6.0-9.5 ppm) of the reaction mixture.

Reaction mixture corresponding to Table S3, entry 5.

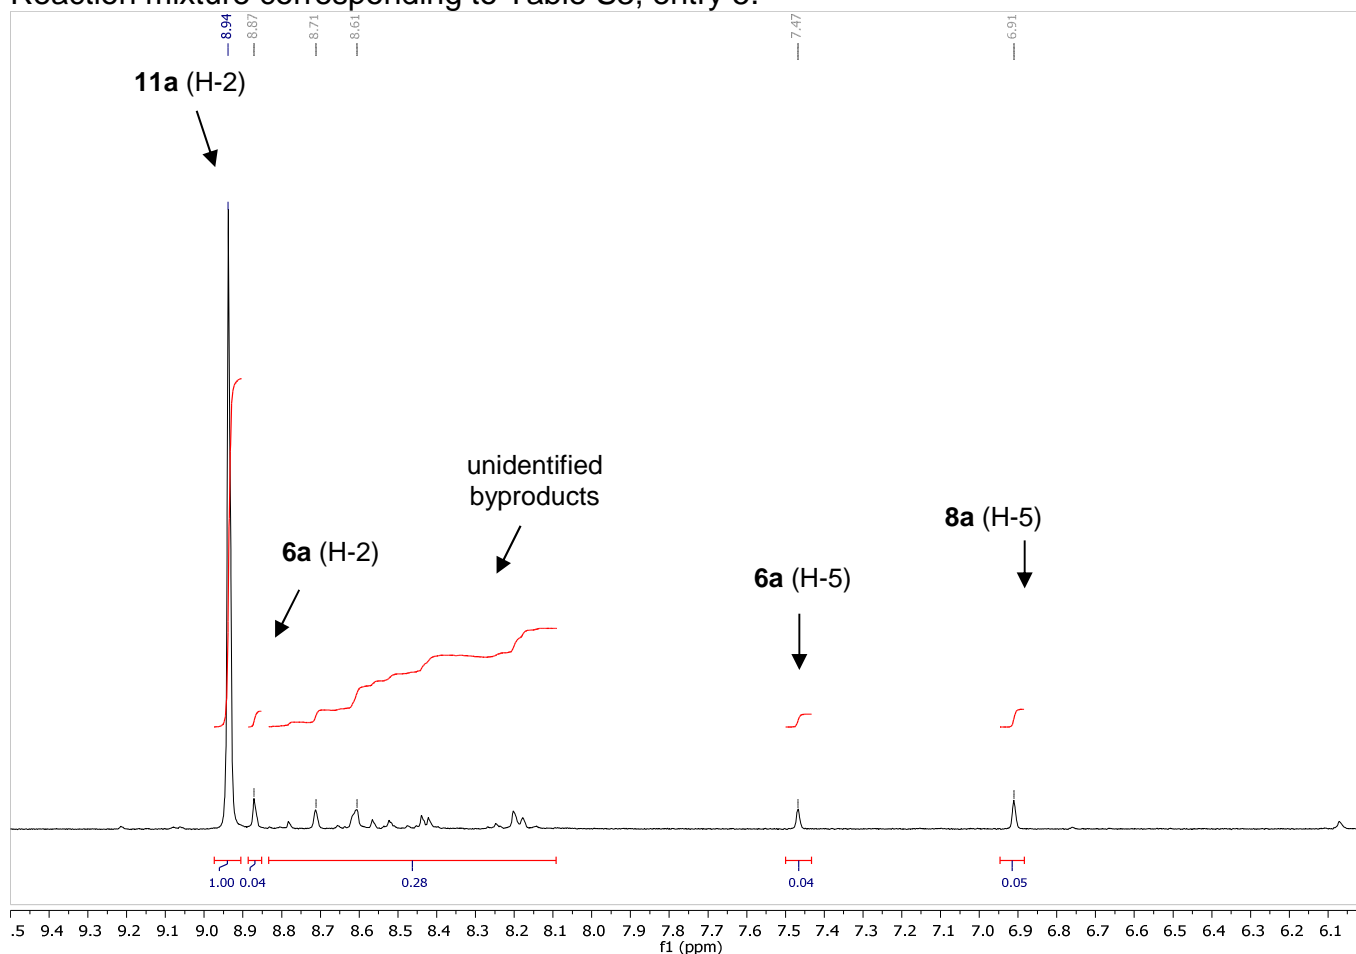

**Table S3 Reaction parameters for the synthesis of 5-acetylsulfanyl-histidine (11a)**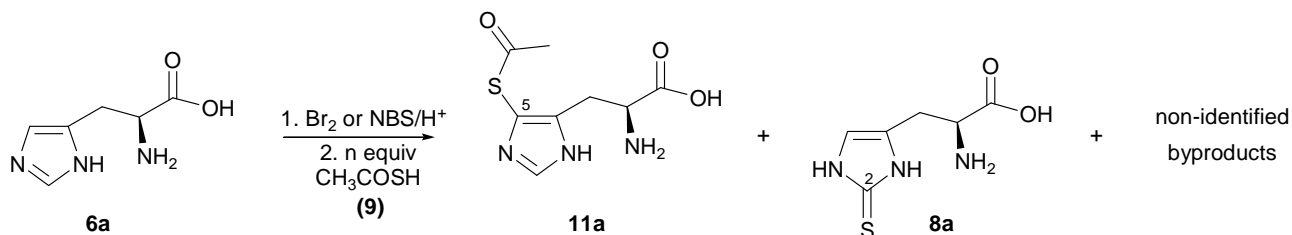

| Entry | Scale (mmol) | HCl | Dilution | Reagent         | Equiv CH <sub>3</sub> COSH ( <b>9</b> ) | Yield (by <sup>1</sup> H NMR of the reaction mixture) |           |           |
|-------|--------------|-----|----------|-----------------|-----------------------------------------|-------------------------------------------------------|-----------|-----------|
|       |              |     |          |                 |                                         | <b>11a</b>                                            | <b>6a</b> | <b>8a</b> |
| 1     | 5            | 1   | 0.55 M   | Br <sub>2</sub> | 4                                       | 58%                                                   | 4%        | 19%       |
| 2     | 5            | 1   | 0.25 M   | Br <sub>2</sub> | 4                                       | 64%                                                   | 3%        | 8%        |
| 3     | 5            | 1   | 0.1 M    | Br <sub>2</sub> | 4                                       | 61%                                                   | 0%        | 7%        |
| 4     | 50           | 1   | 0.45 M   | Br <sub>2</sub> | 4                                       | 65%                                                   | 2%        | 11%       |
| 5     | 250          | 1   | 0.15 M   | Br <sub>2</sub> | 4                                       | 70%                                                   | 3%        | 3%        |
| 6     | 5            | 1   | 0.25 M   | Br <sub>2</sub> | 10                                      | 76%                                                   | 1%        | 6%        |
| 7     | 5            | 1   | 0.25 M   | Br <sub>2</sub> | 1                                       | 52%                                                   | 5%        | 21%       |
| 8     | 5            | 2   | 0.25 M   | Br <sub>2</sub> | 4                                       | 63%                                                   | 4%        | 14%       |
| 9     | 20           | 1   | 0.15 M   | NBS             | 4                                       | 61%                                                   | 8%        | 4%        |
| 10    | 50           | 2   | 0.15 M   | NBS             | 4                                       | 67%                                                   | 1%        | 3%        |
| 11    | 100          | 2   | 0.15 M   | NBS             | 4                                       | 68%                                                   | 0%        | 4%        |

Applying the optimal conditions identified for sulfur-introduction using cysteine as reagent, using a slight excess of bromine (1.3 equiv), followed immediately by the addition of an excess of thioacetic acid (entry 1), 5-acetylsulfanyl-histidine **11a** (58%), was formed besides a minor amount of 2-thiohistidine (**8a**) and residual histidine.

Variation of different reaction parameters showed that under stronger dilution (entry 2 and 3), and also on a higher scale (entry 4 and 5) a quite similar product profile is observed, with a reactional yield of 61-70% of the new product. Interestingly, the relative percentage of 2-thiohistidine **8a** seems to be slightly influenced by dilution, and the best results were obtained in the concentration range for **6a** from 0.15-0.25 M. Using ten instead of four equivalents of thioacetic acid **9**, the yield was only slightly improved (entry 6), and even with only one equivalent of **9**, **11a** was still obtained in 52% yield (entry 7), but then again a higher percentage of the 2-thiohistidine derivative was observed.

A higher percentage of 2-substituted product **8a** is also observed conducting the reaction in the presence of 2 equivalents of hydrochloric acid instead of 1 (entry 8), but the 5-substituted product **11a** is still obtained in good yield.

The same preference towards 5-substitution by thioacetic acid is observed with N-bromosuccinimide (NBS) instead of bromine to activate the histidine, with the best results in the presence of 2 equivalents of acid and a slightly longer activation time before addition of thioacetic acid (entry 9-11).

**L-5-Acetylsulfanyl- $\alpha$ ,N,N**-dimethyl-histidine (**11c**). $^1\text{H}$  NMR ( $\text{D}_2\text{O}$ , 300 MHz)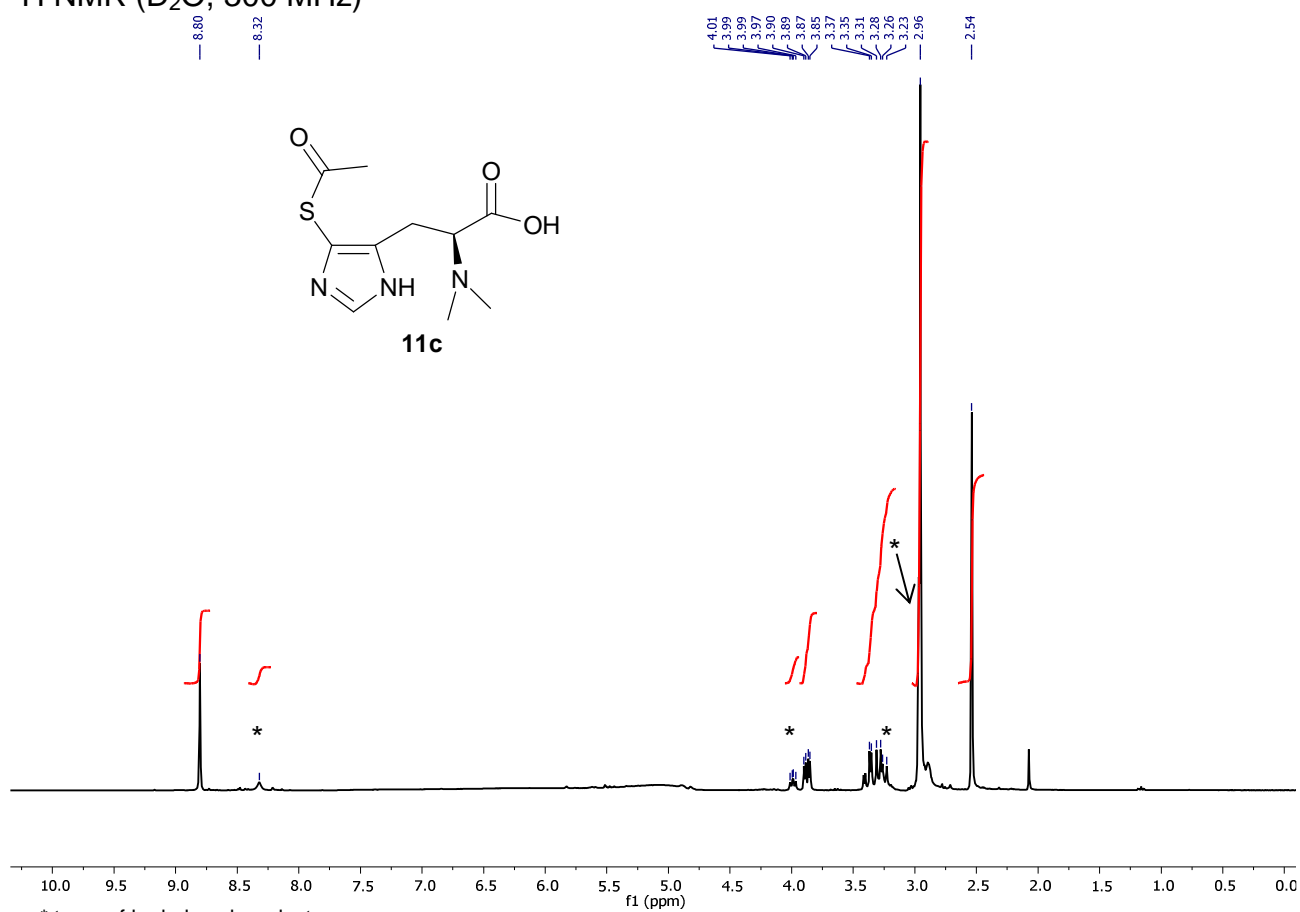 $^{13}\text{C}$  NMR ( $\text{D}_2\text{O}$ , 75 MHz)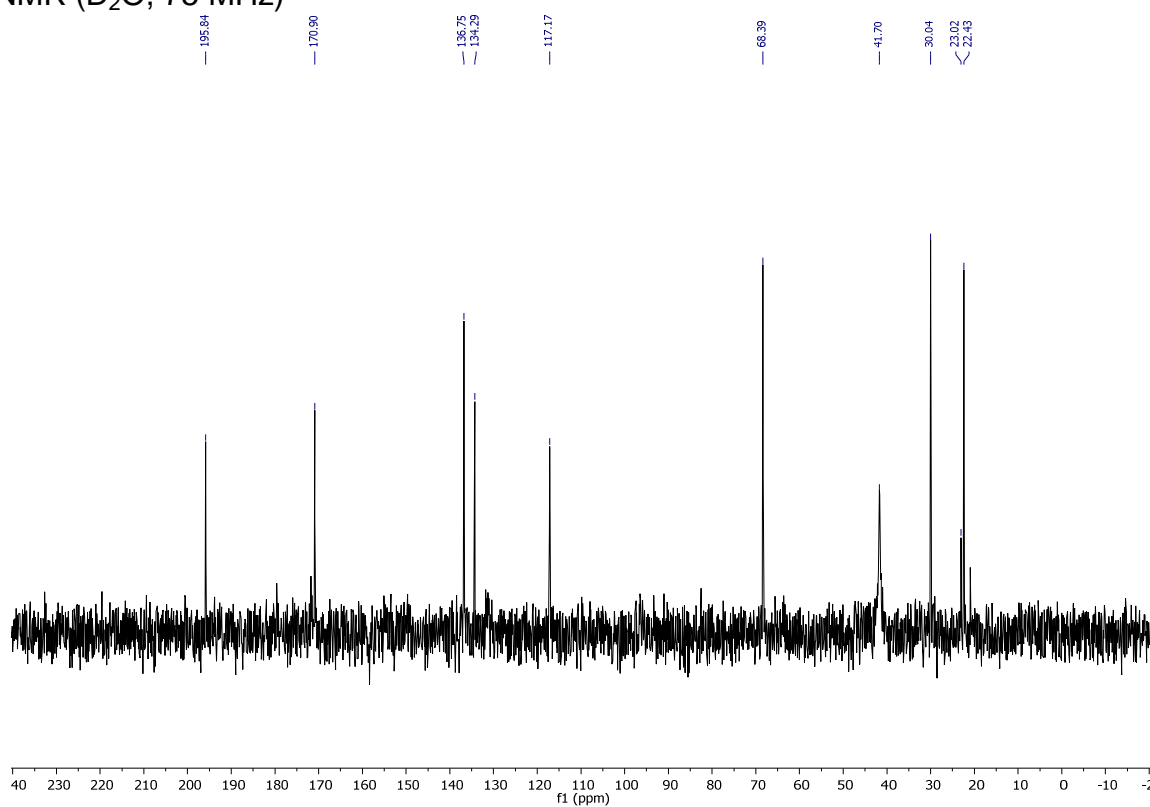

## APCI-MS

Scan AP+  
2.00e5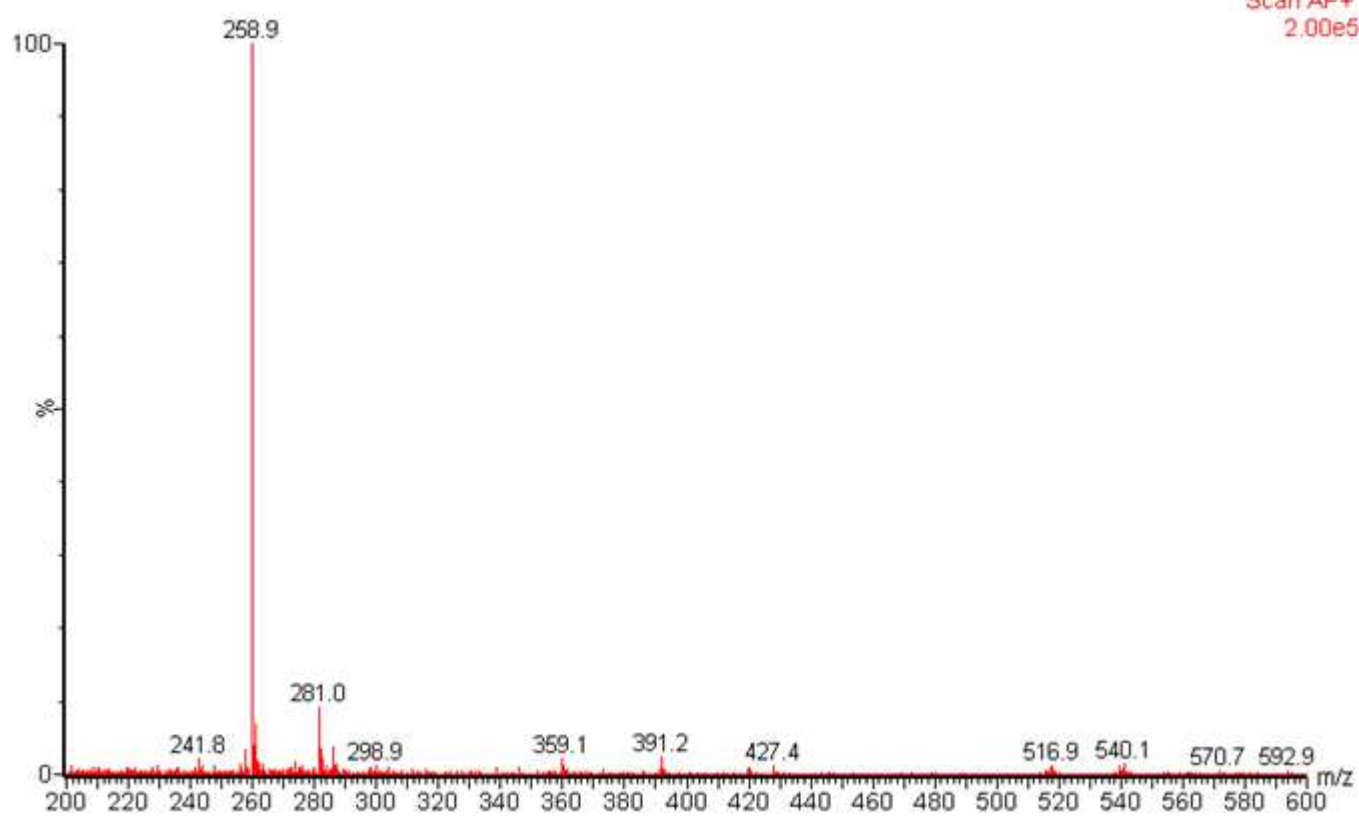

**L-5-Acetylsulfanyl- $\alpha$ ,N,N,N**-trimethyl-histidine (**12**). $^1\text{H}$  NMR ( $\text{D}_2\text{O}$ , 300 MHz)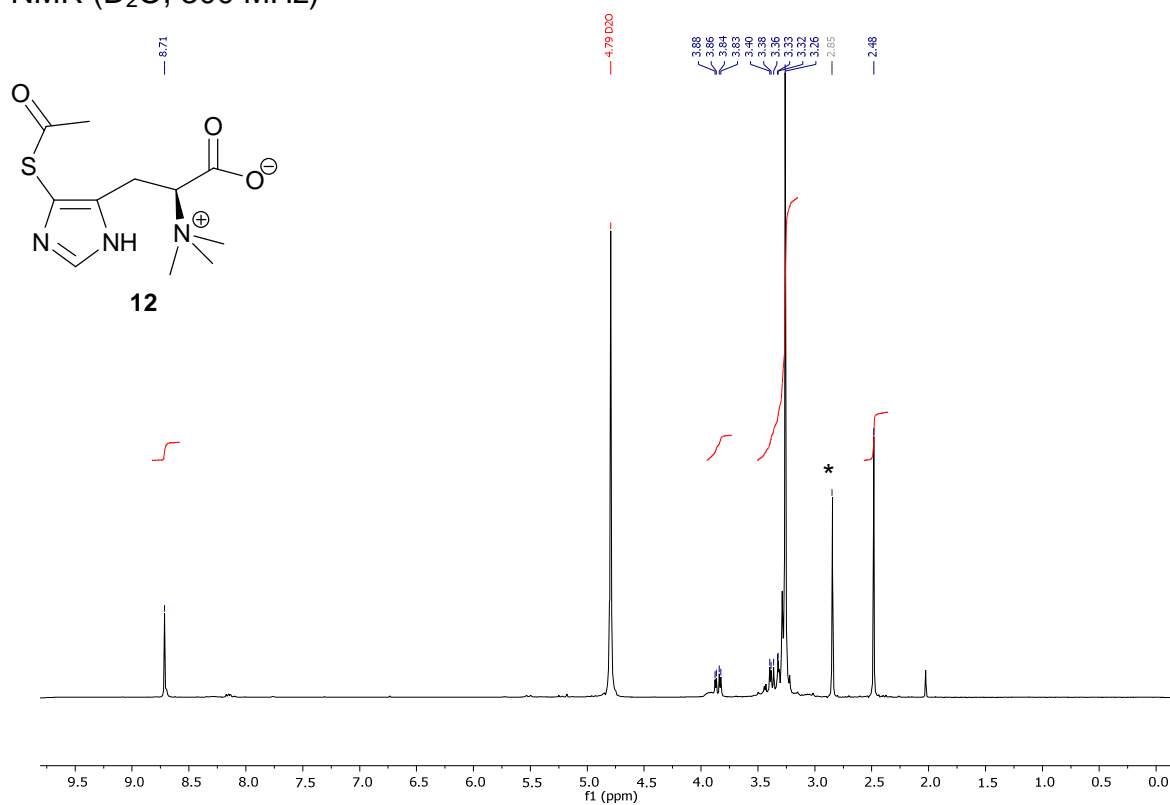

\* trace of residual succinimide

 $^{13}\text{C}$  NMR ( $\text{D}_2\text{O}$ , 75 MHz)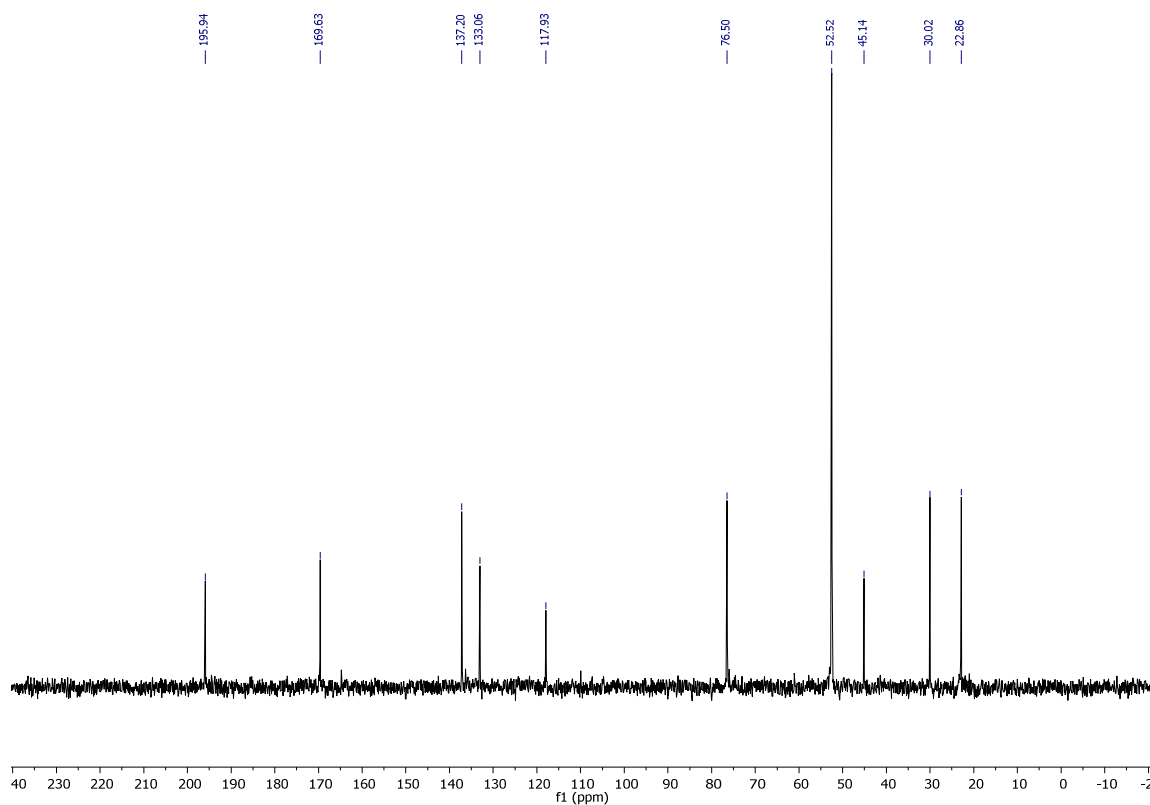

**L-5-sulfanyl-histidine (16a)** $^1\text{H}$  NMR ( $\text{D}_2\text{O}$ , 400 MHz)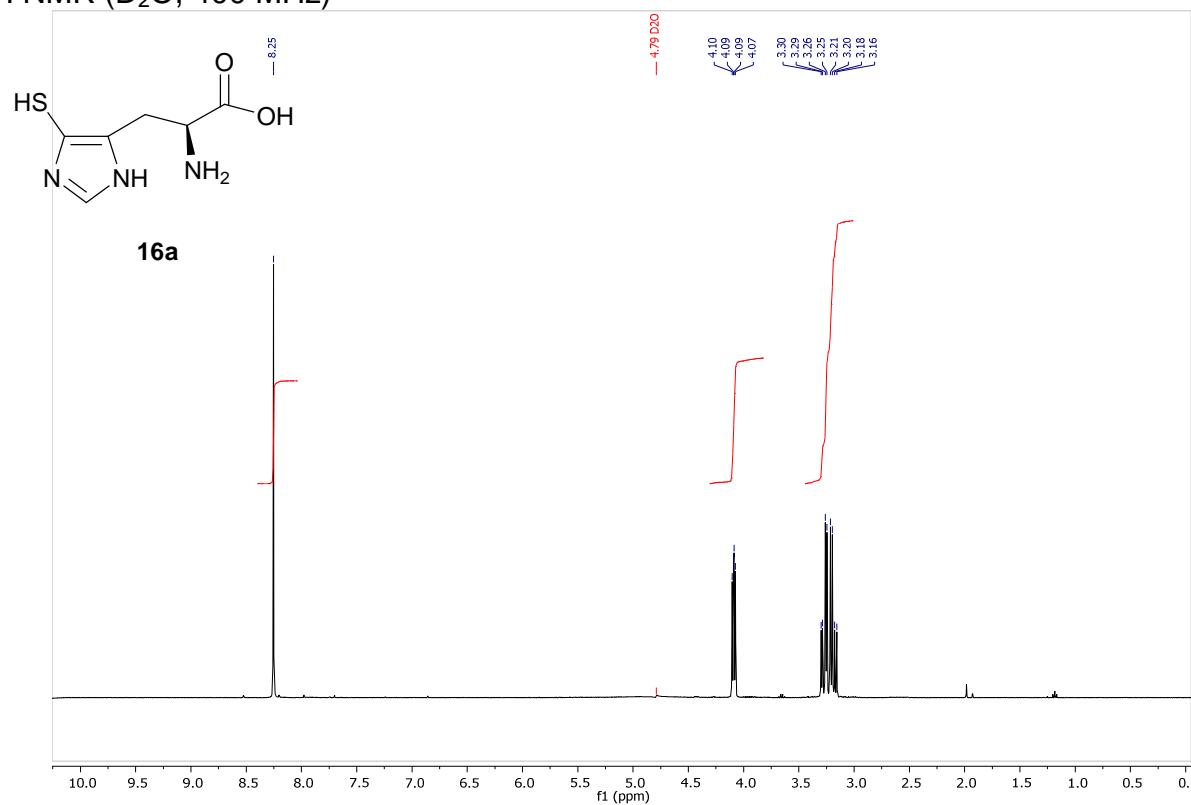 $^{13}\text{C}$  NMR ( $\text{D}_2\text{O}/\text{DCI}$ , 75 MHz)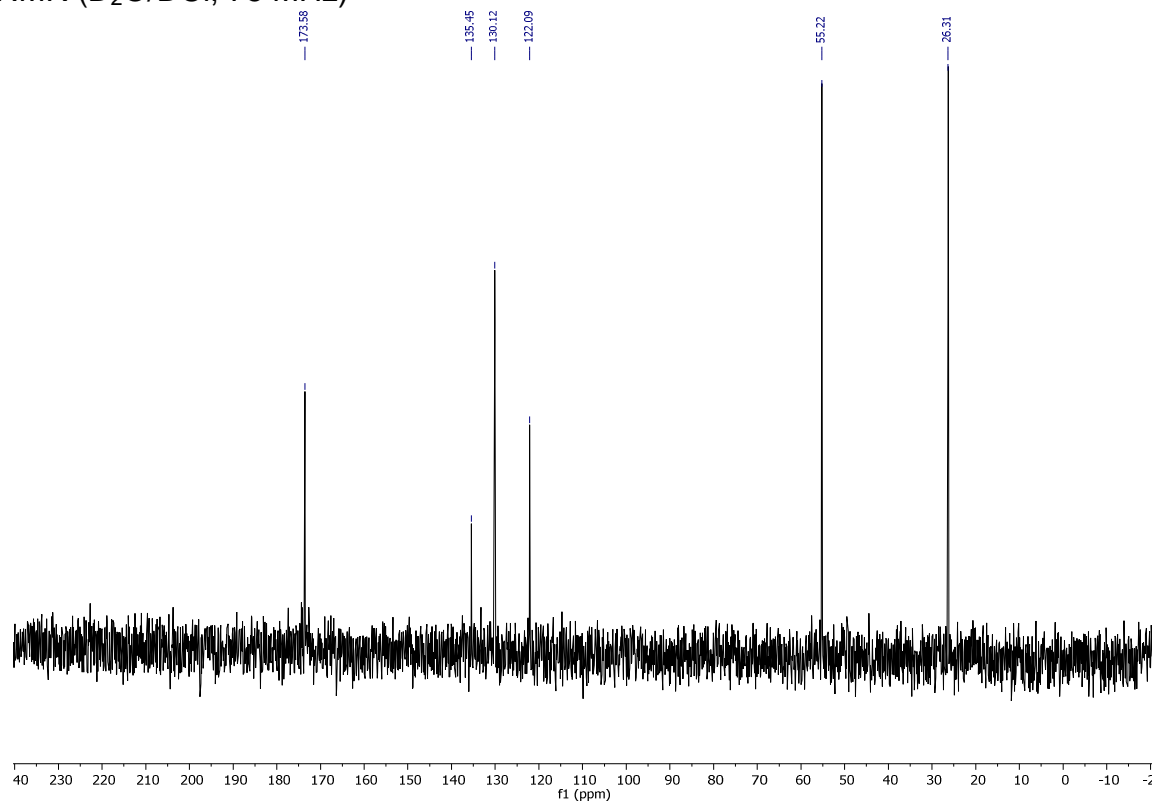

## APCI - MS

Scan AP-  
3.18e4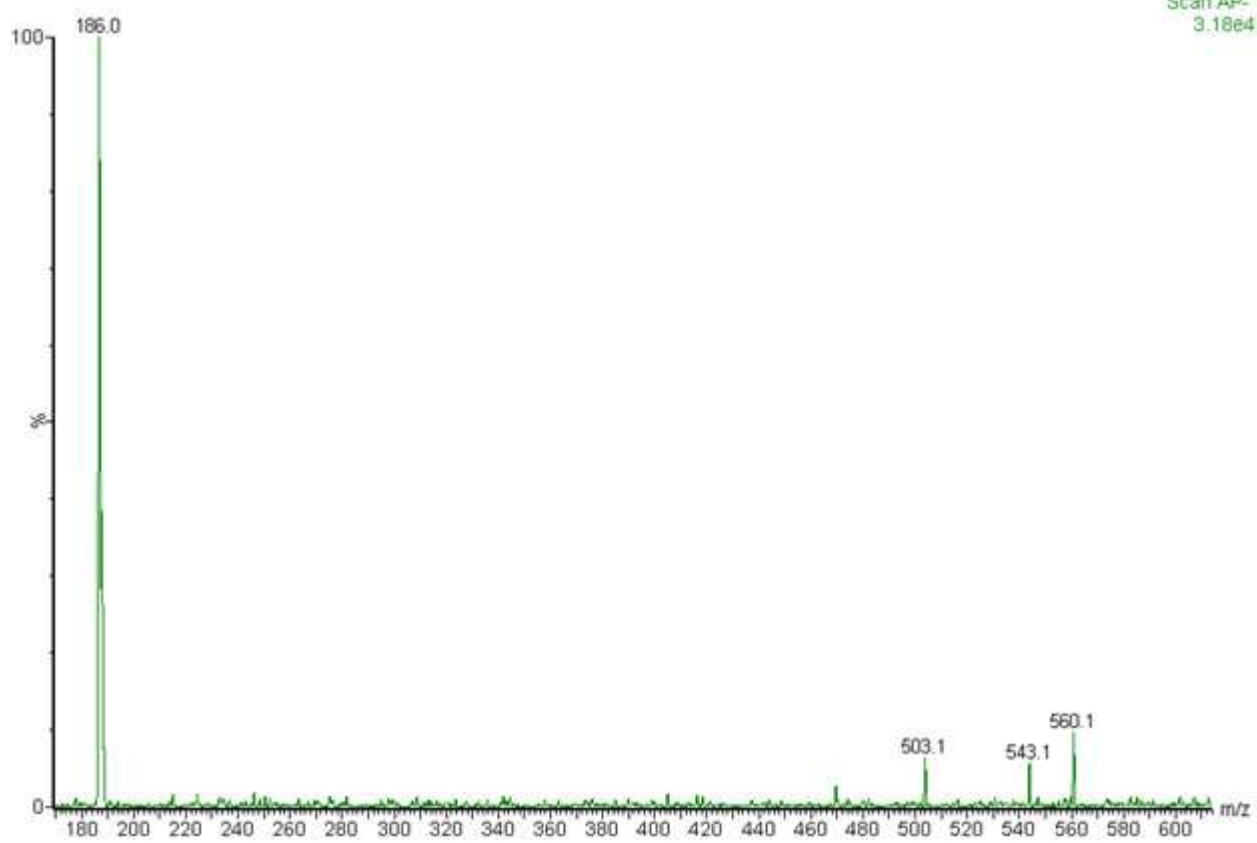



**Disulfide 17b** $^1\text{H}$  NMR ( $\text{D}_2\text{O}/\text{DCI}$ , 300 MHz)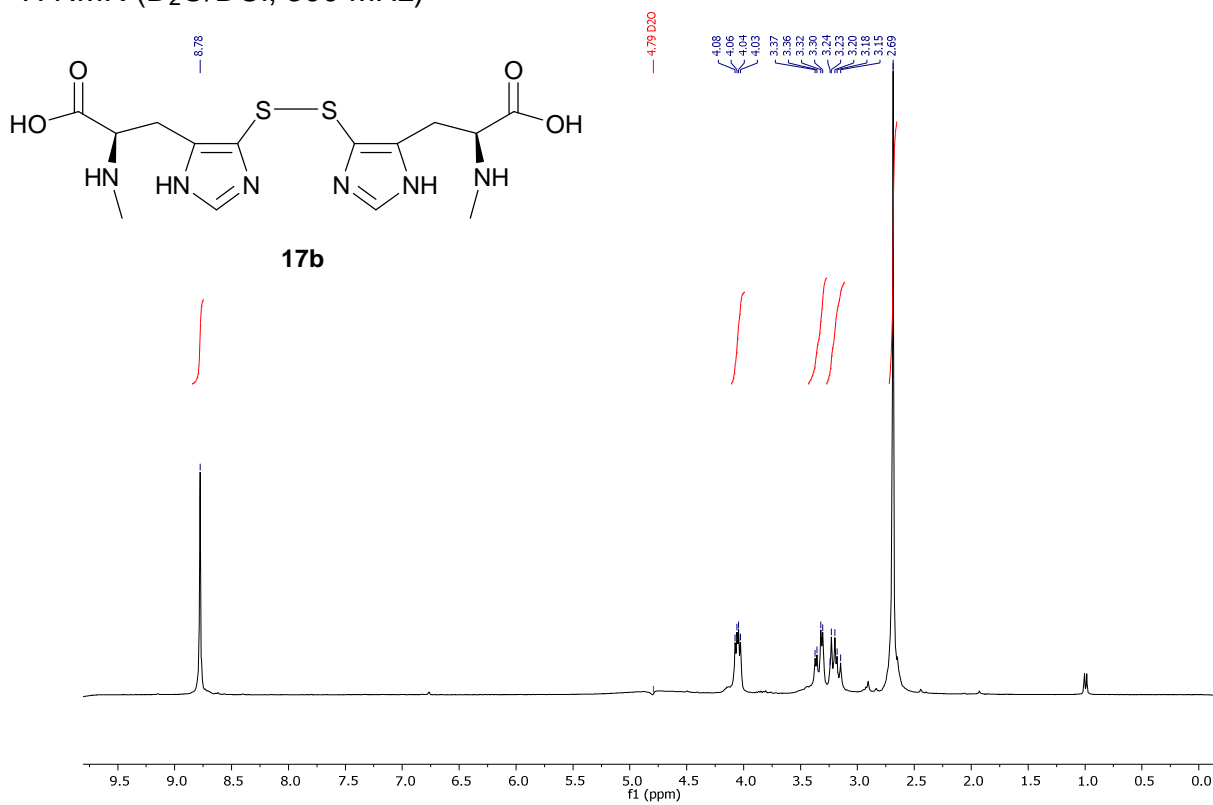 $^{13}\text{C}$  NMR ( $\text{D}_2\text{O}/\text{DCI}$ , 75 MHz)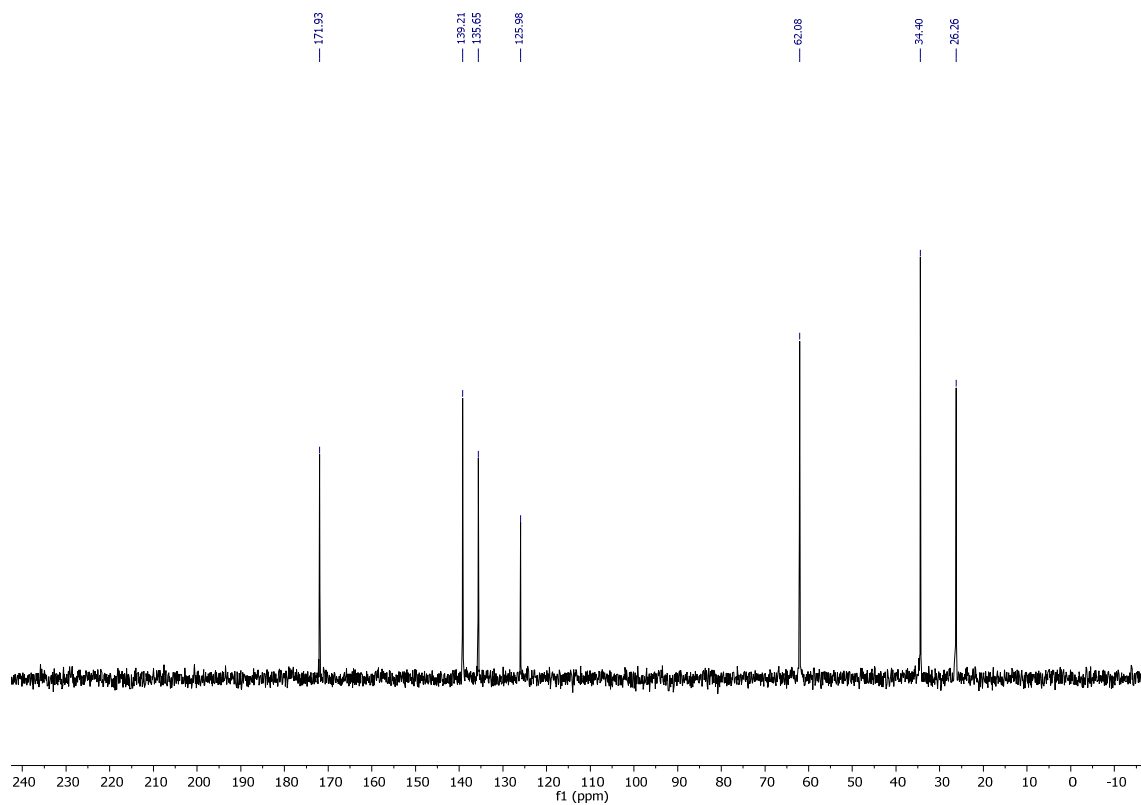

LC (column B, see Experimental Part)

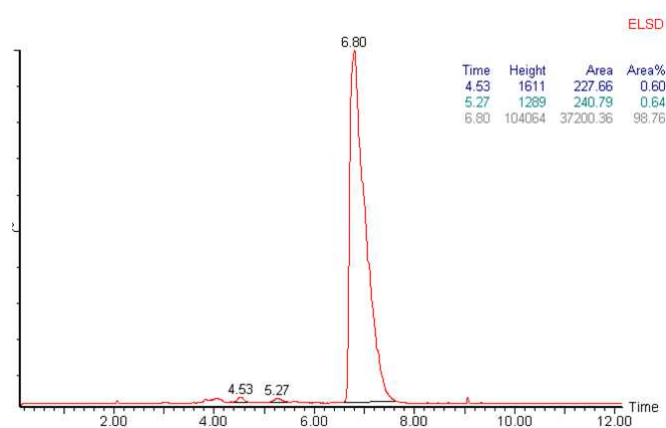

APCI - MS

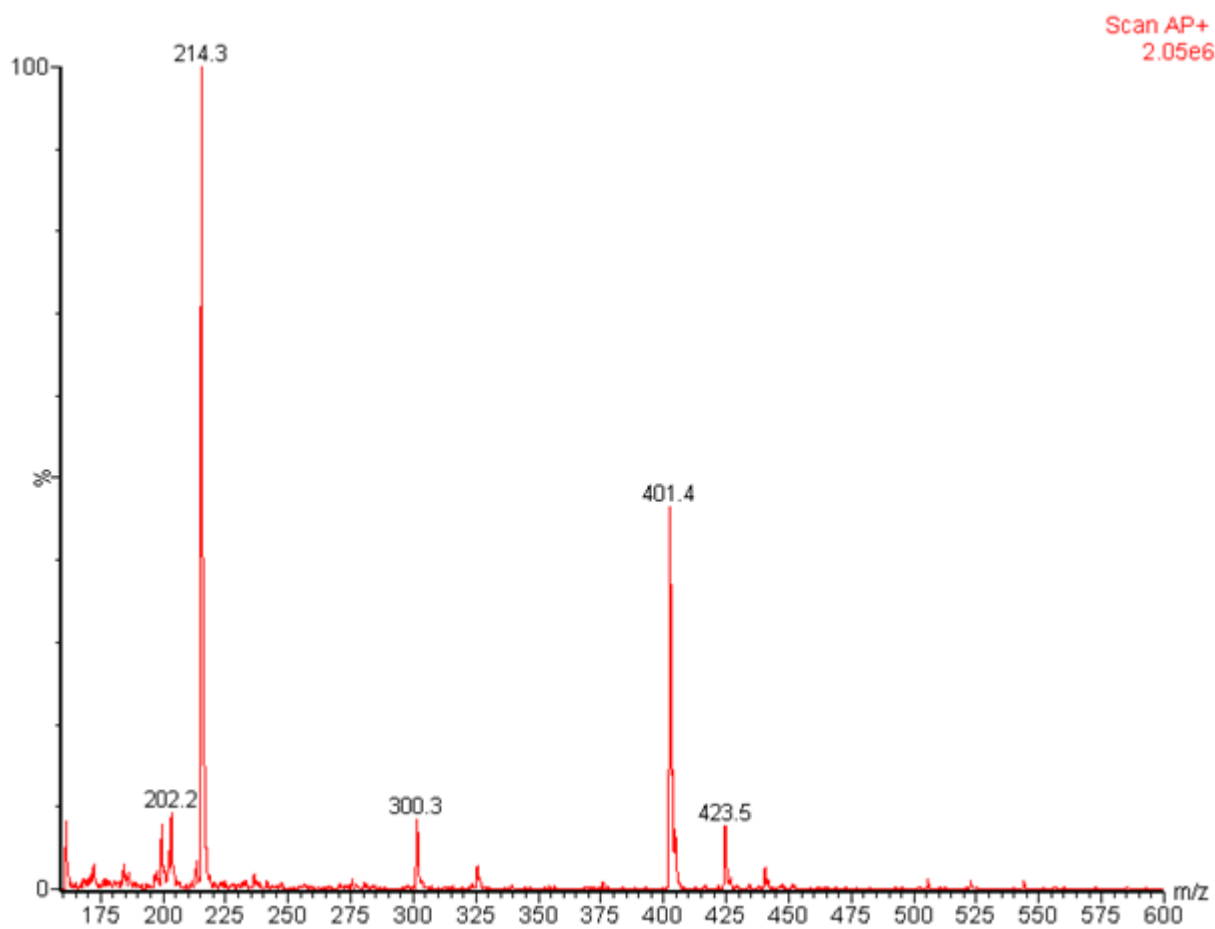

**Disulfide 17c** $^1\text{H}$  NMR ( $\text{D}_2\text{O}$ , 400 MHz)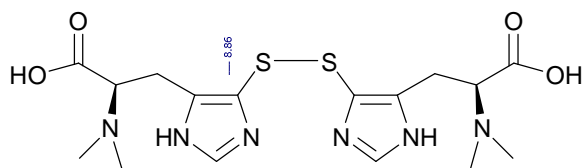**17c x 2 HCl x 2 HBr**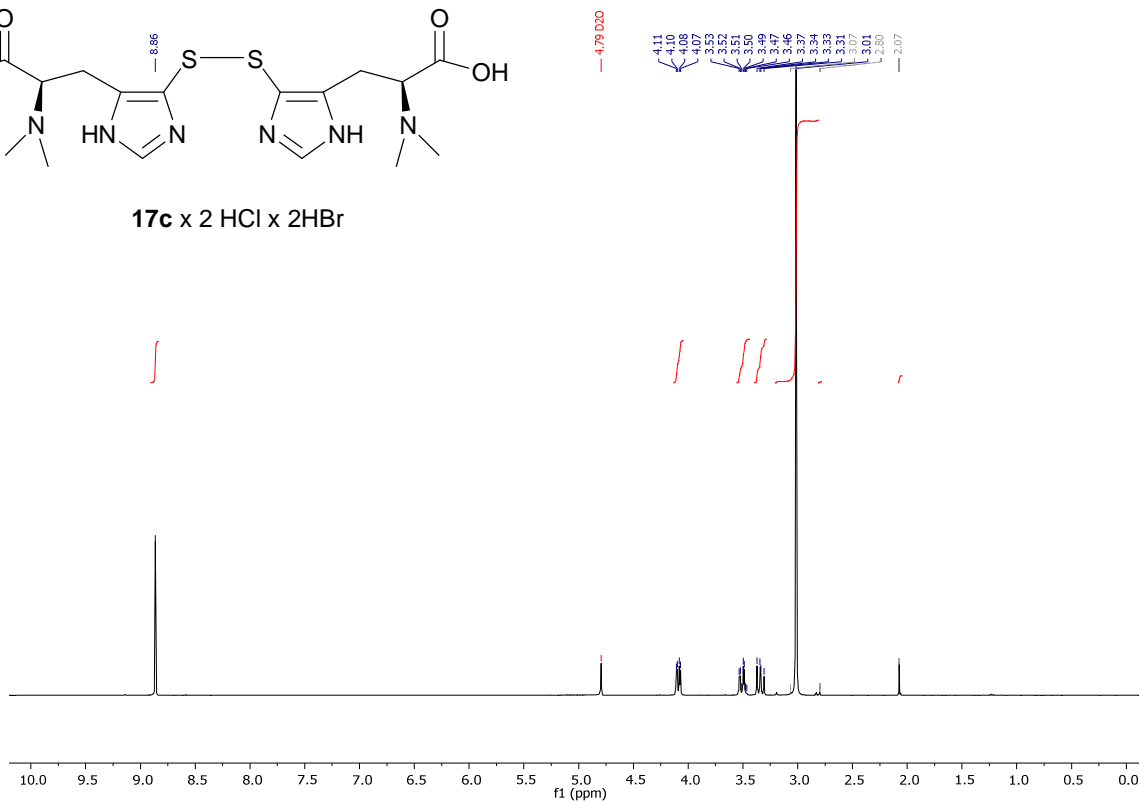 $^{13}\text{C}$  NMR ( $\text{D}_2\text{O}$ , 75 MHz)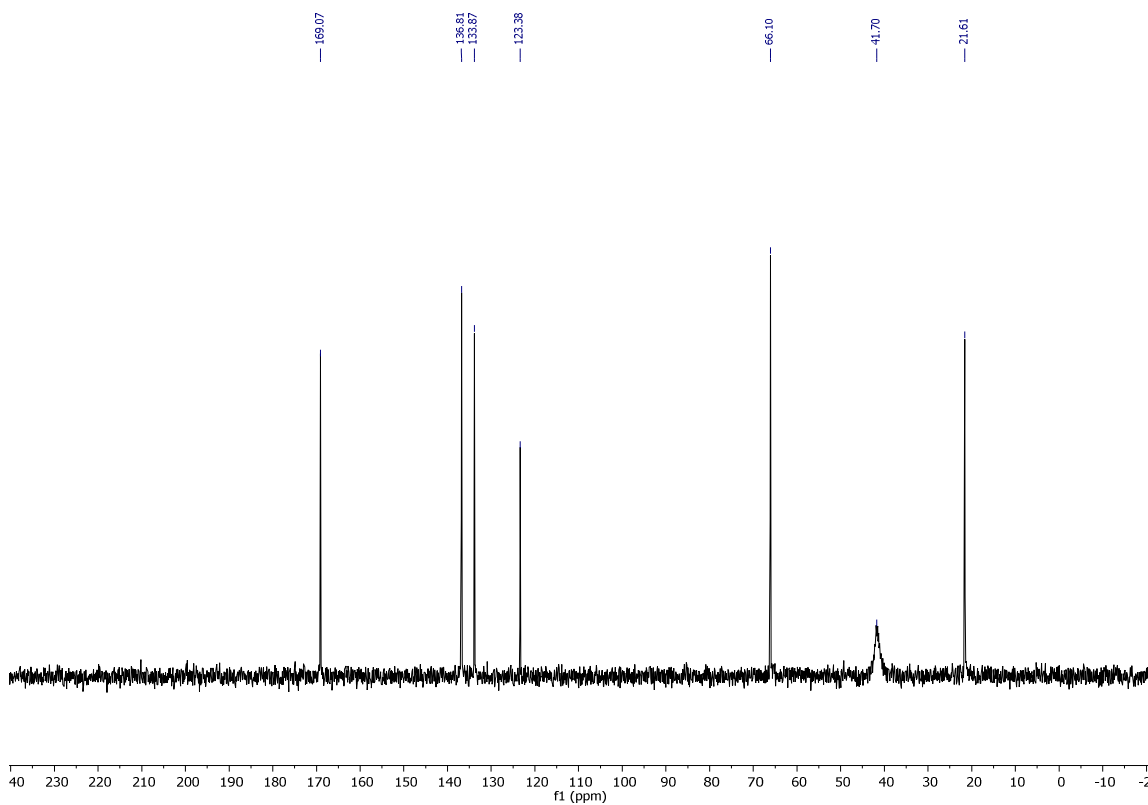

## LC (column B, see Experimental Part)

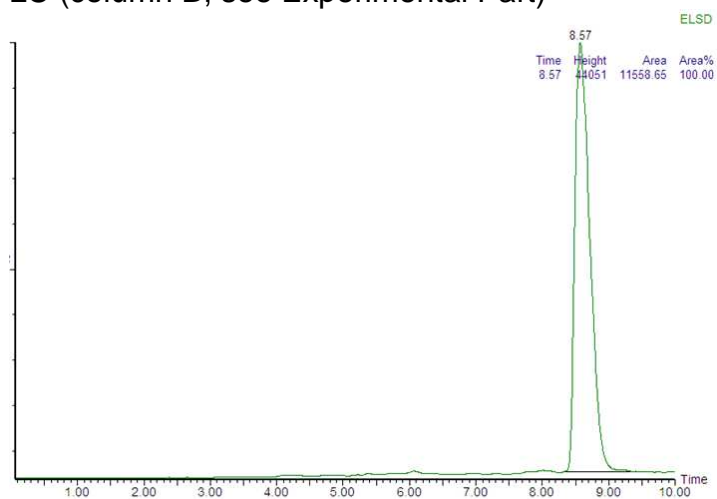

## APCI - MS:

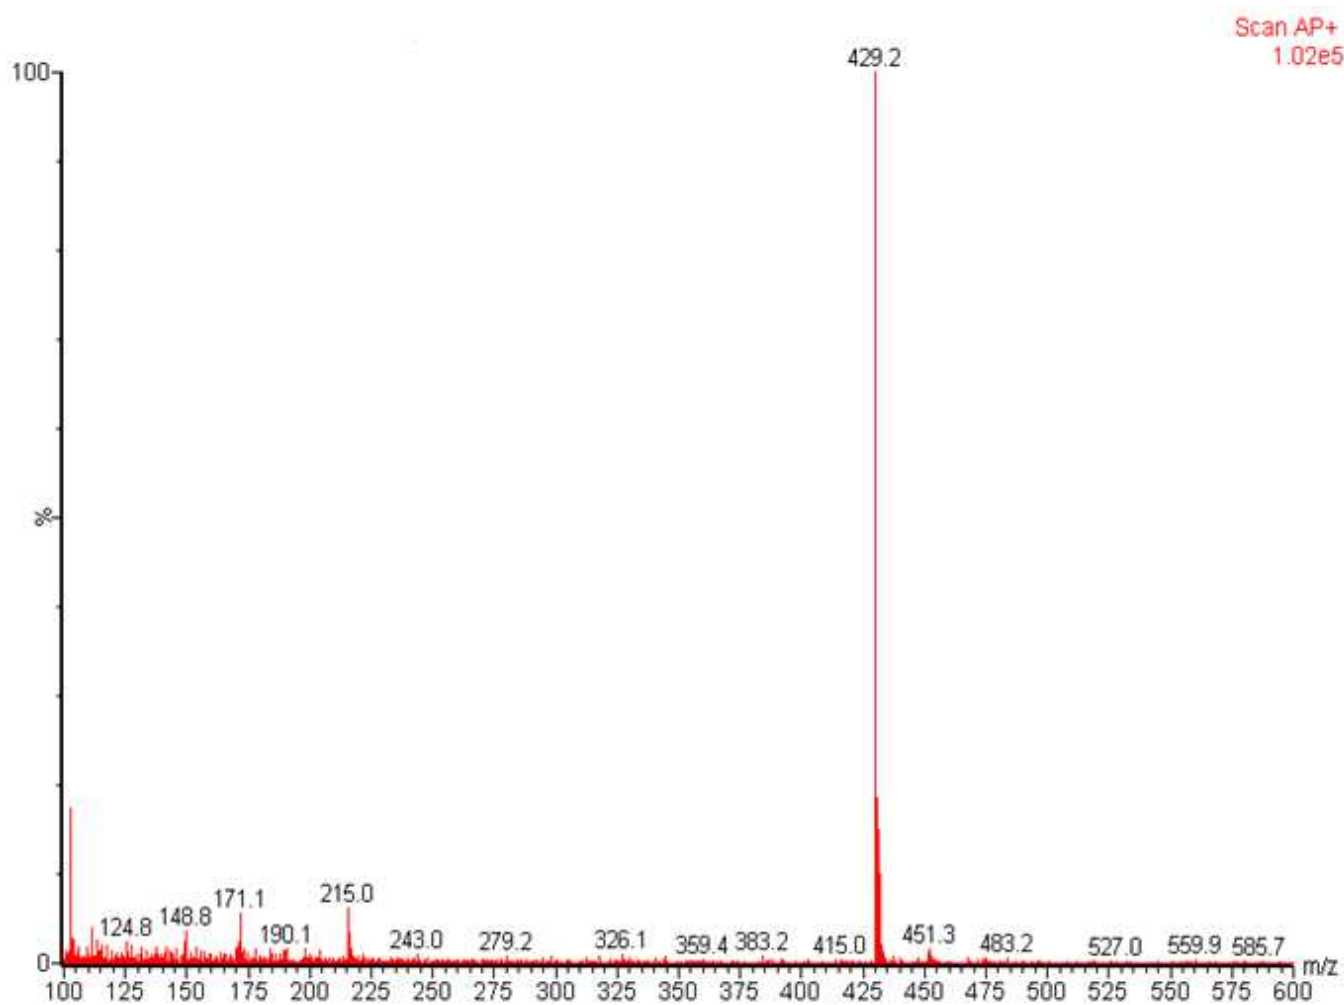

**L-5-sulfanyl- $\alpha$ -N,N,N-trimethyl-histidine (16d)** $^1\text{H}$  NMR ( $\text{D}_2\text{O}$ , 400 MHz)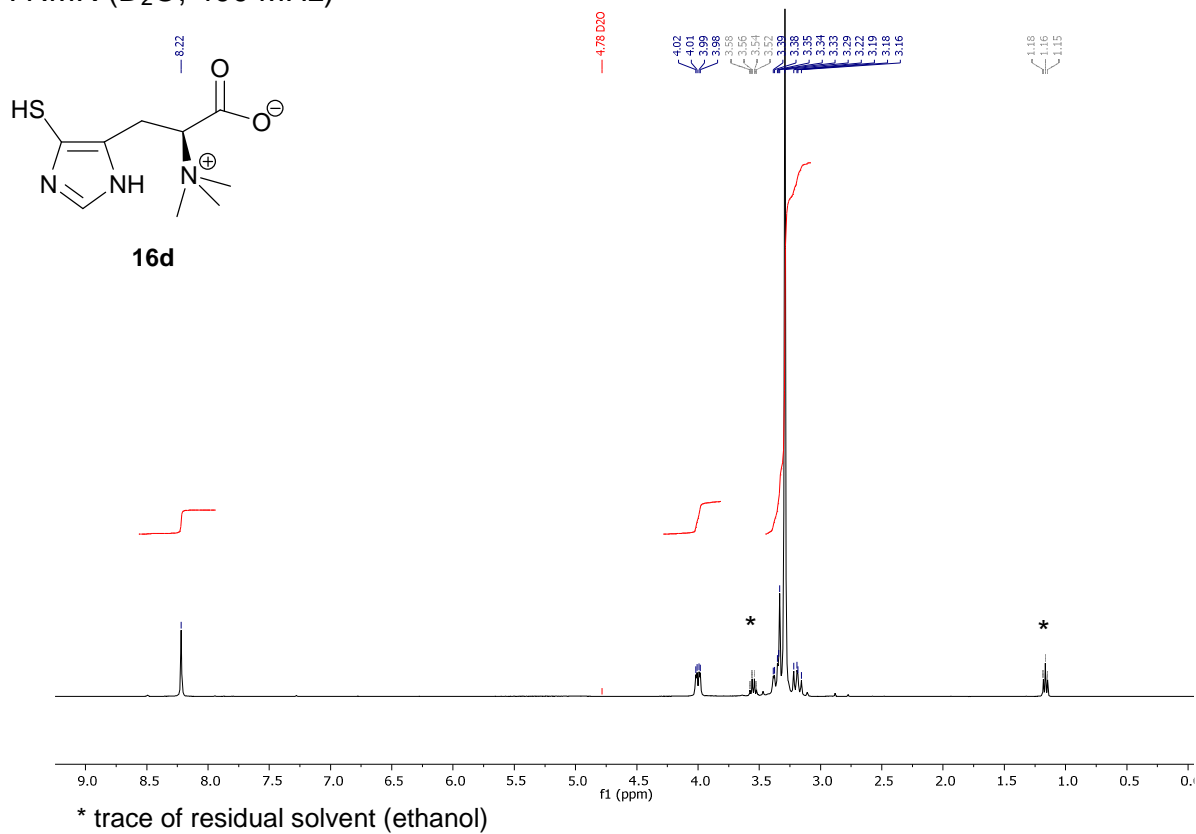

APCI - MS:

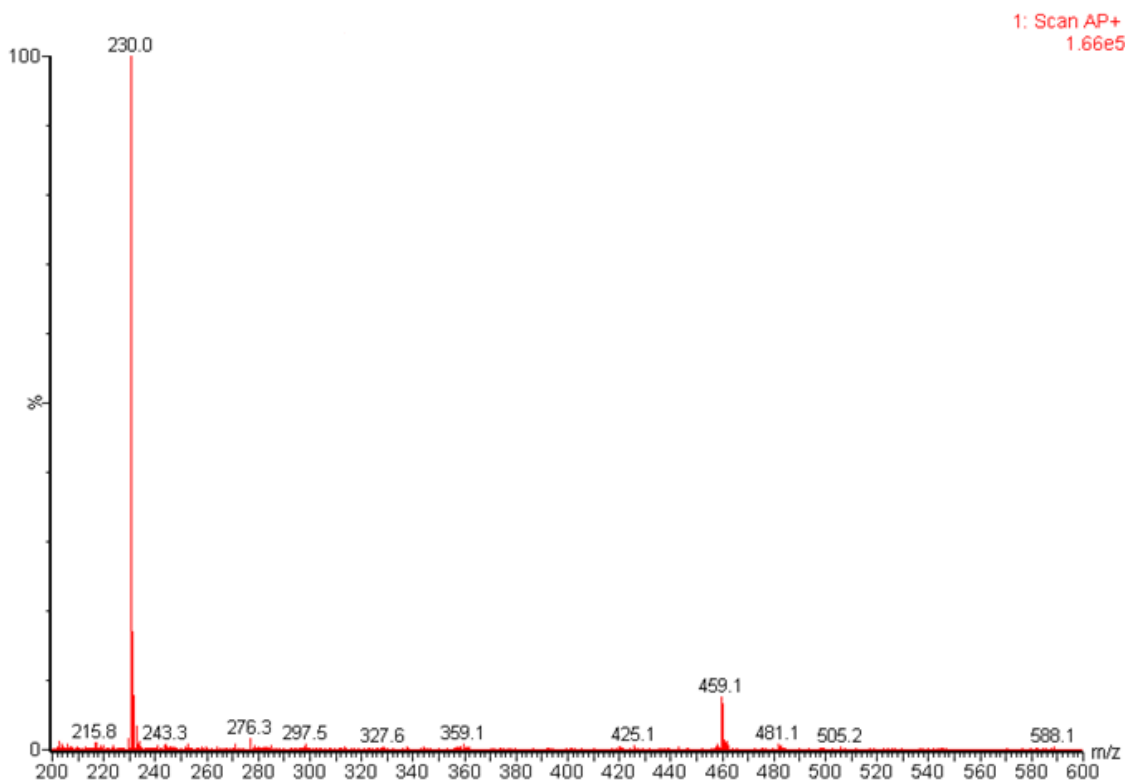

**Disulfide 17d.** $^1\text{H}$  NMR (MeOD, 400 MHz)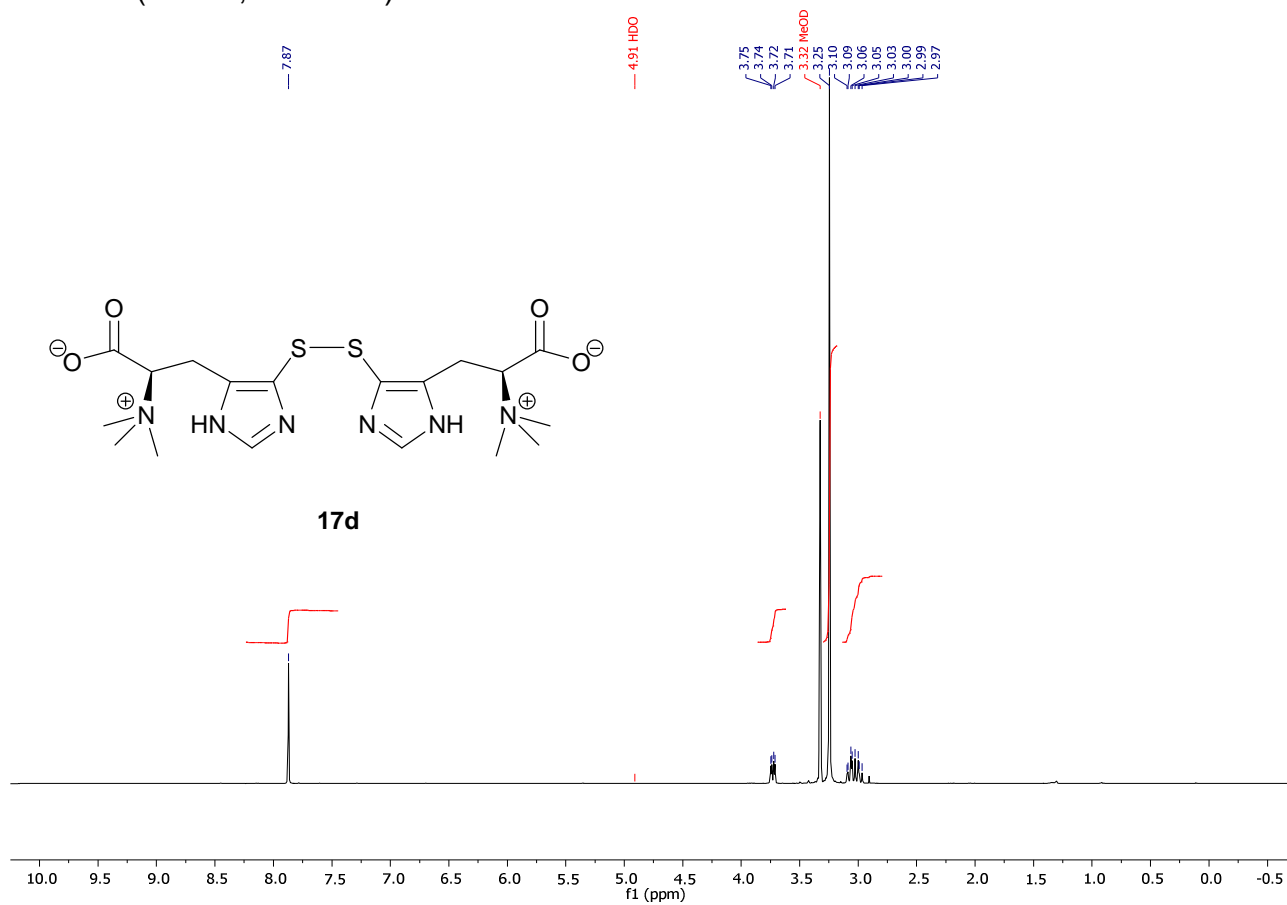 $^{13}\text{C}$  NMR (D<sub>2</sub>O, 75 MHz)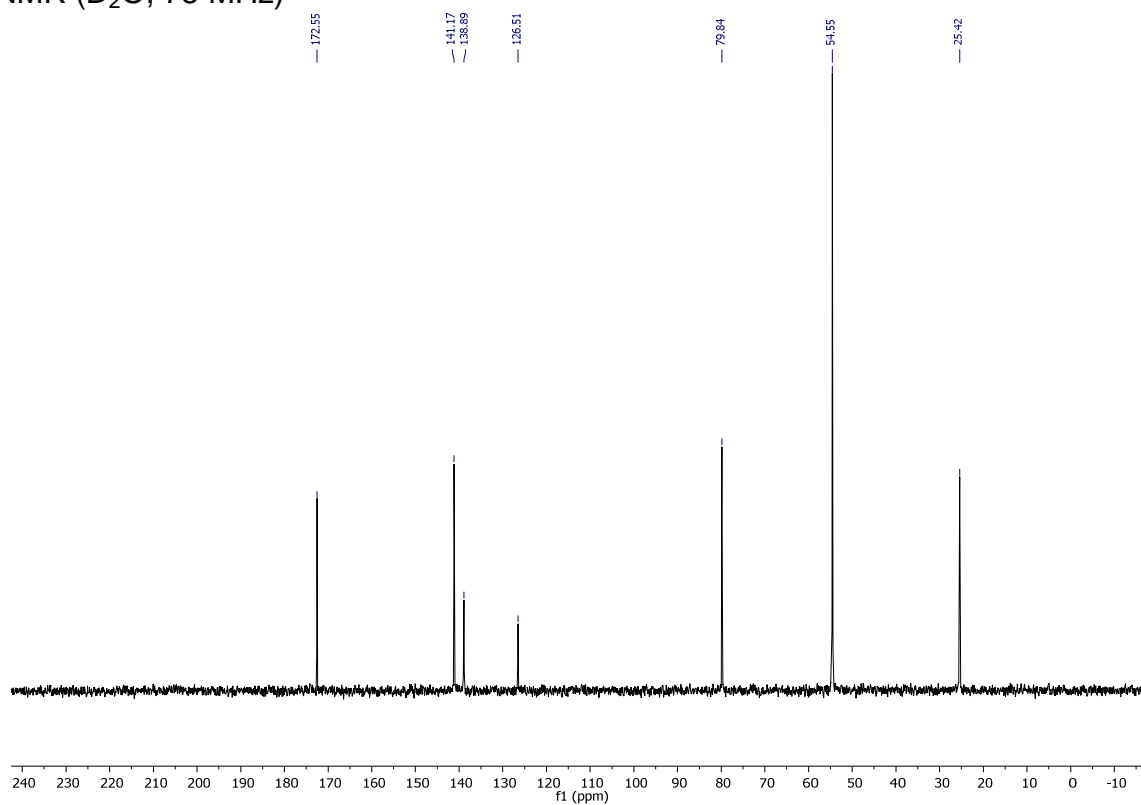

## HPLC (column A, see Experimental Part)

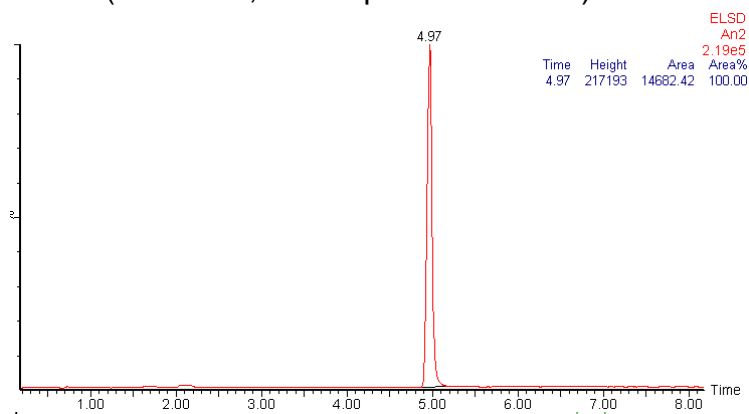

## APCI - MS:

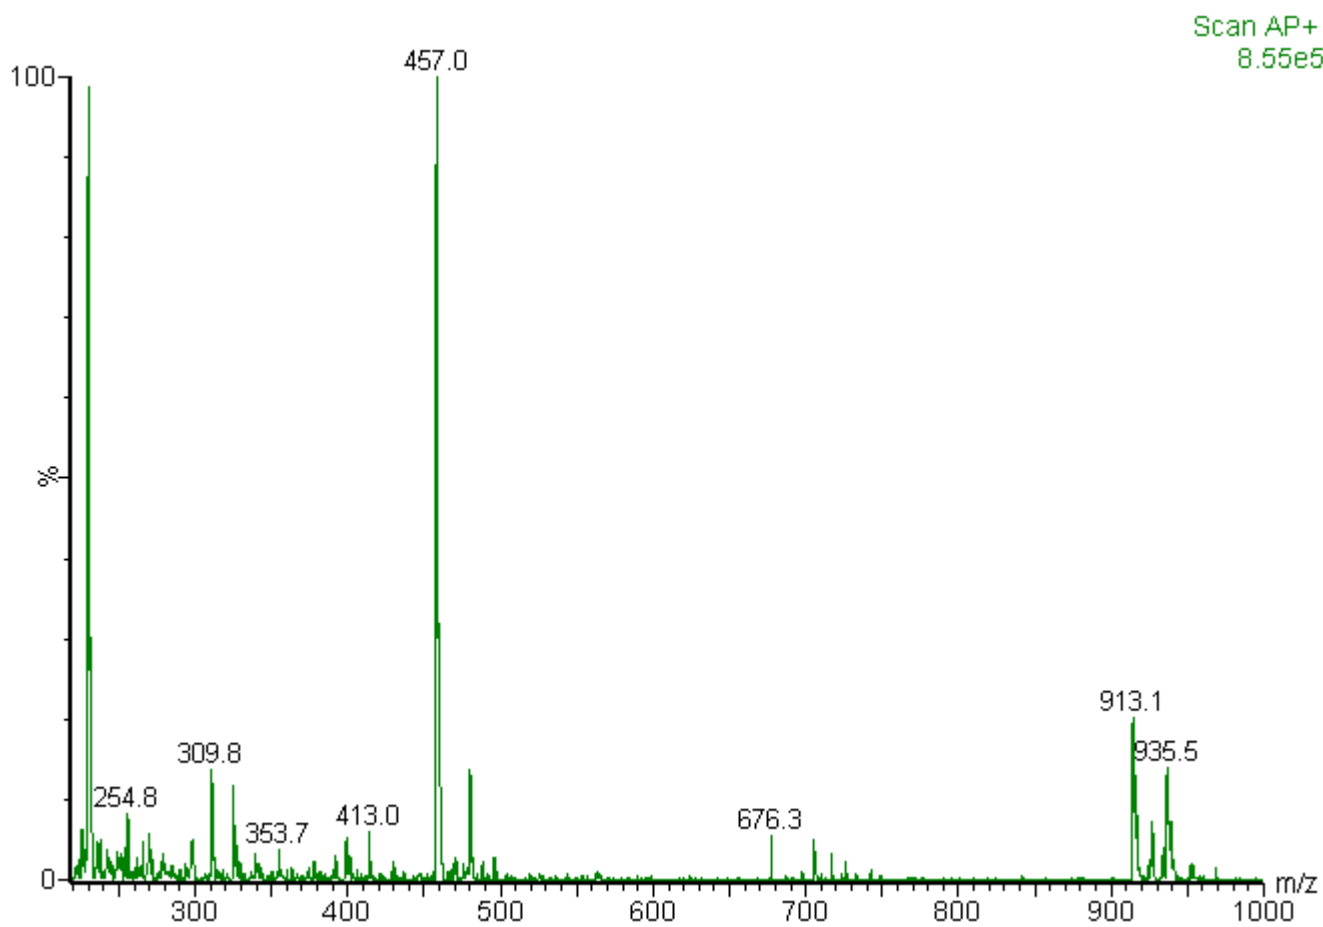

## Disulfide 17e

 $^1\text{H}$  NMR ( $\text{D}_2\text{O}$ , 400 MHz)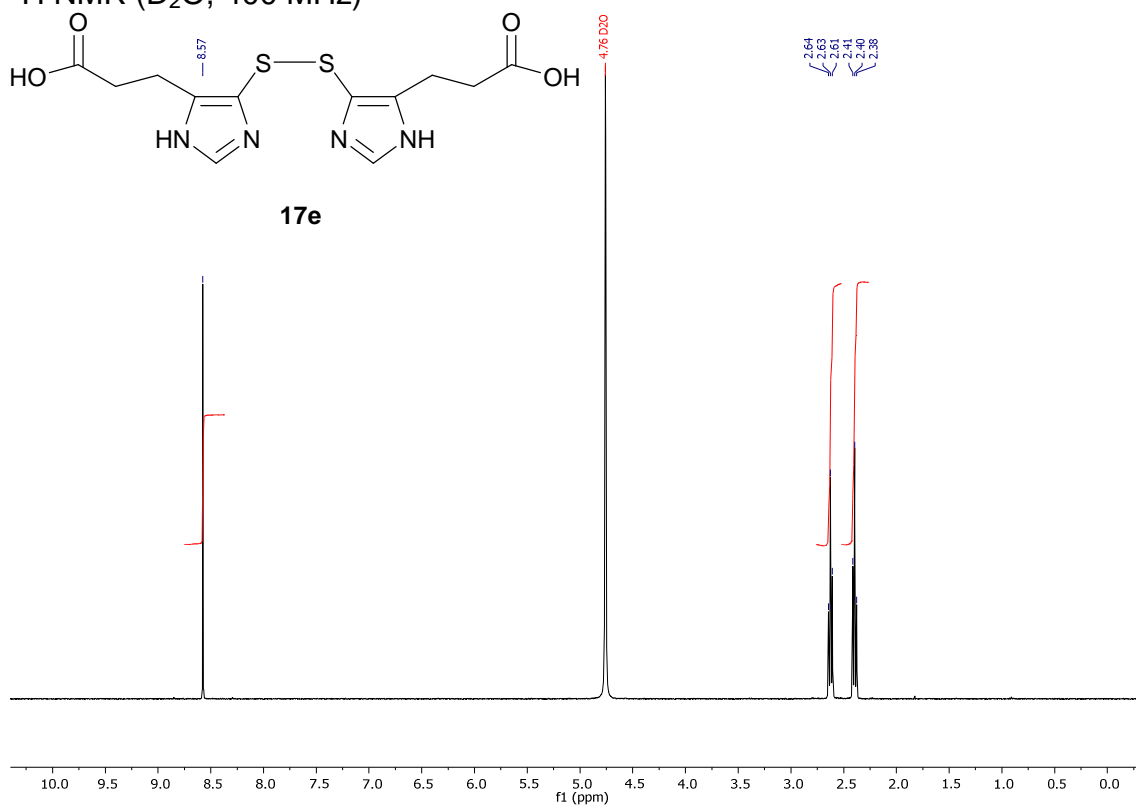 $^{13}\text{C}$  NMR ( $\text{D}_2\text{O}$ , 75 MHz)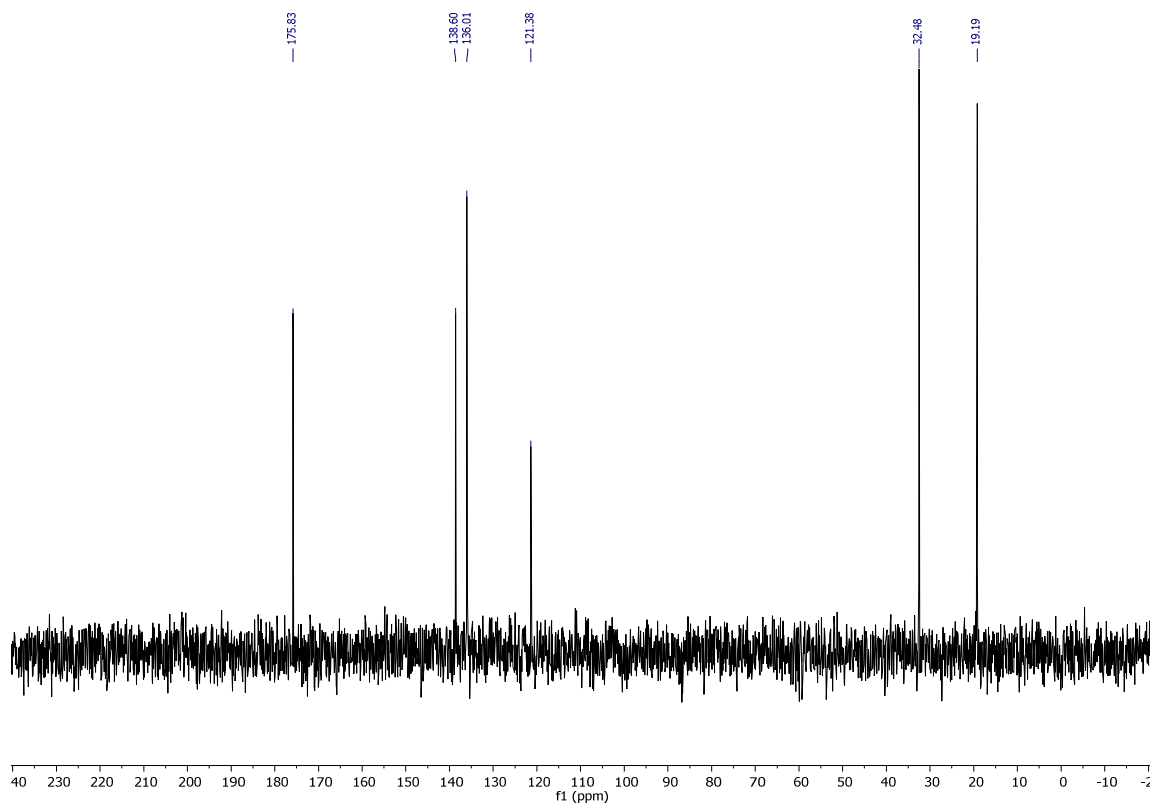

Supplement: c6ob01870j1.pdf [file c6ob01870j1.pdf]
